# Supplementary material for: tBHQ Induces a Hormetic Response That Protects L6 Myoblasts against the Toxic Effect of Palmitate
Source: Hindawi journal article supplement (doi:10.1155/2020/3123268), 2020-05-16
Supplement: f1 [file 3123268.f1.pdf]

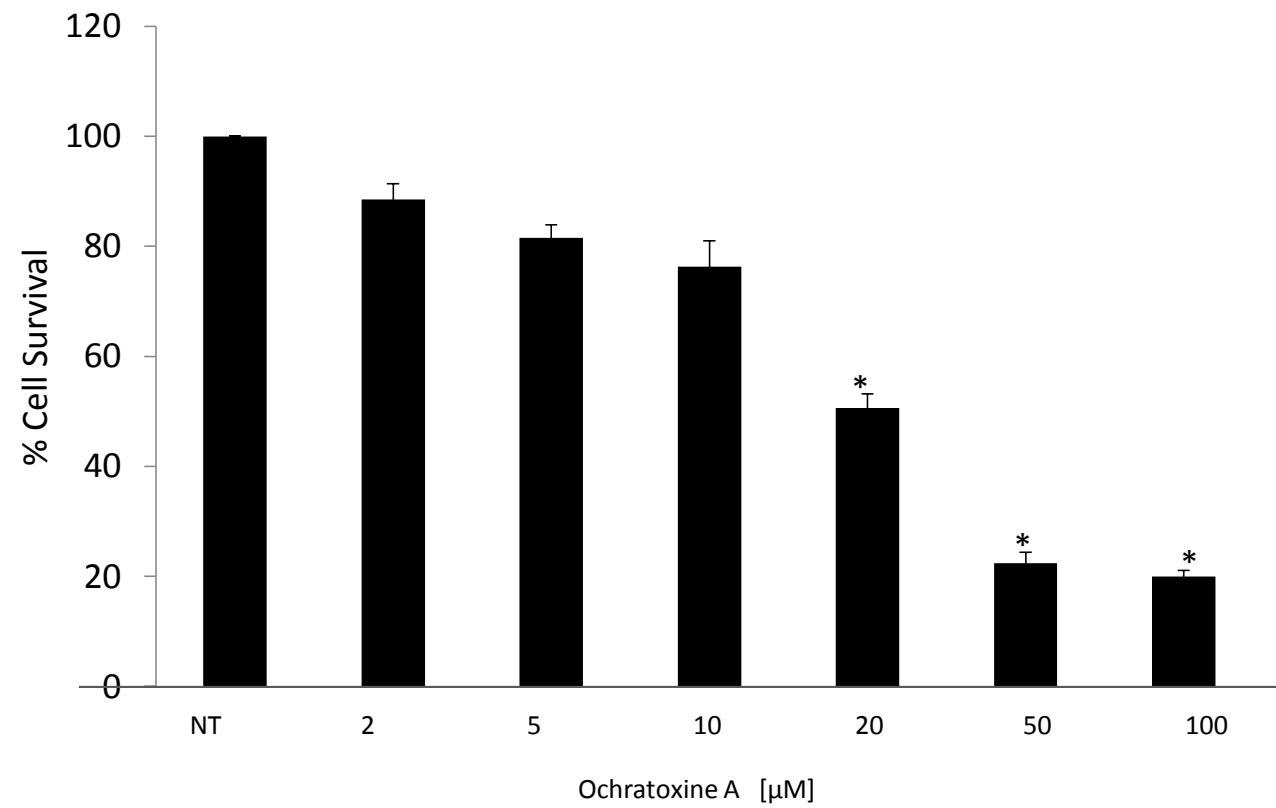

Supplementary FIGURE 1 A

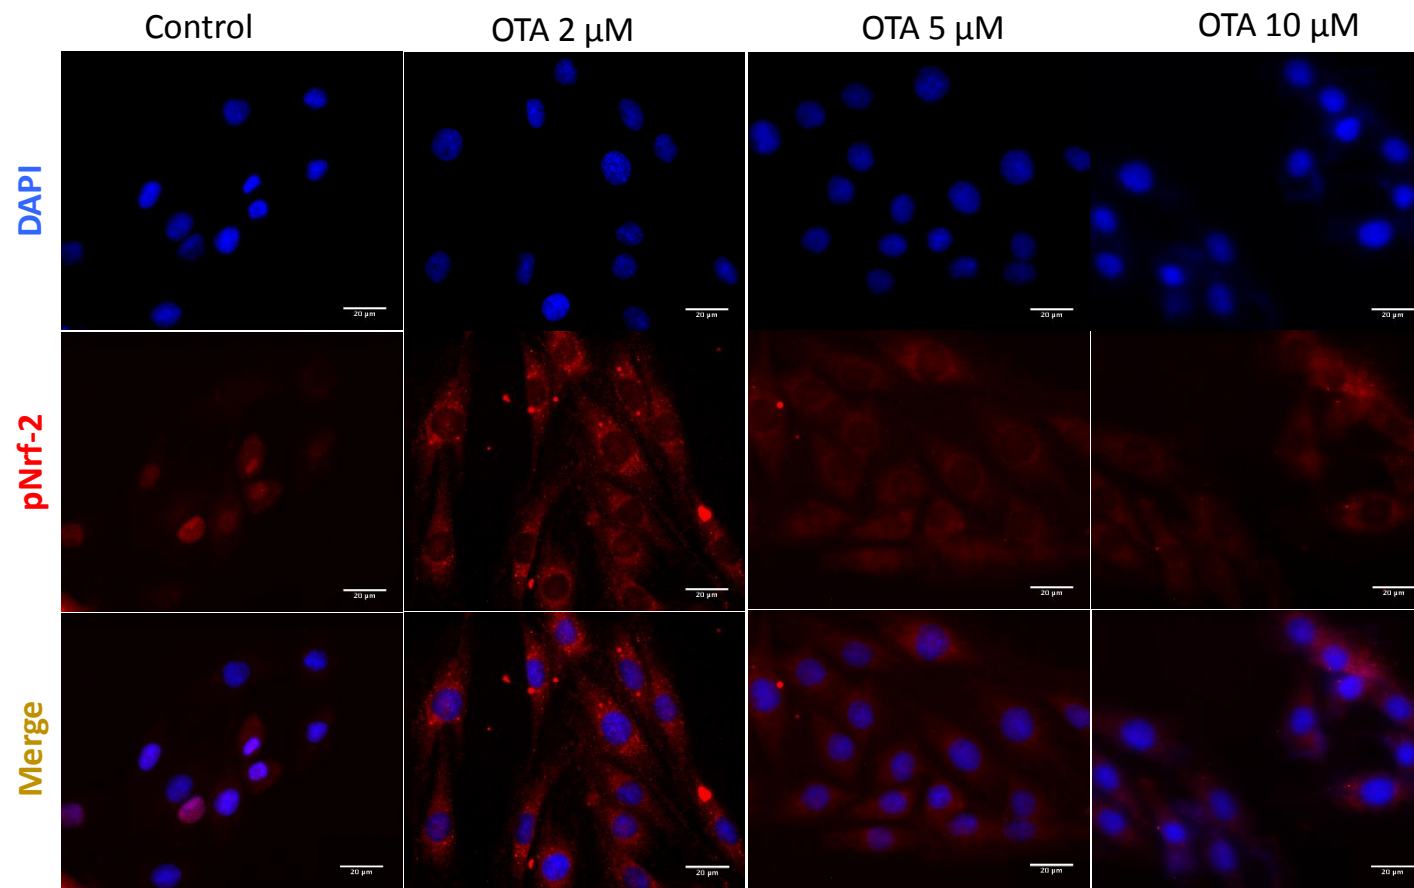

Supplementary FIGURE 1 B
